# Supplementary material
Source: PubMed Central journal article supplement (PMC9254076)
Supplement: NIHMS1816277-supplement-Supplement.pdf [file NIHMS1816277-supplement-Supplement.pdf]

## **SUPPLEMENTARY MATERIAL**

### **Title**

Hypertension Induces Gonadal Macrophage Imbalance, Inflammation, Lymphangiogenesis, and Dysfunction

### **Authors and Affiliations**

Shobana Navaneethabalakrishnan, PhD, Brooke K. Wilcox, BS, Bethany L. Goodlett, BS, Malea M. Murphy, PhD, Brett M. Mitchell, PhD\*

Department of Medical Physiology, Texas A&M College of Medicine, Bryan, Texas, United States of America

### **\*Corresponding Author**

Brett Mitchell, PhD, ORCID: 0000-0002-2575-8761, [brettmitchell@tamu.edu](mailto:brettmitchell@tamu.edu), 8447 Riverside Parkway, Bryan, TX 77807; 1.979.436.0751

## Supplementary Tables

Table S1. Flow cytometry panel description for mouse gonads.

| Fluorochrome | BV421  | FITC  | APC   | PE-Cy7 | BV785  |
|--------------|--------|-------|-------|--------|--------|
| Antigen      | CD45.2 | CD11b | CD11c | F4/80  | CD206  |
| Clone        | 104    | M1/70 | N418  | BM8    | C068C2 |

Abbreviations: BV=Brilliant Violet; FITC=fluorescein isothiocyanate;  
APC=allophycocyanin; PE-Cy7=R-phycoerythrin cyanine 7

Table S2. Primer sequences for quantitative RT-PCR analysis of murine gonadal tissue.

| Target          | Forward (5' to 3')       | Reverse (5' to 3')       |
|-----------------|--------------------------|--------------------------|
| <i>Il1b</i>     | GCCACCTTTTGACAGTGATGAG   | GACAGCCCAGGTCAAAGGTT     |
| <i>Il6</i>      | GAGGATACCACTCCCAACAGACC  | AAGTGCATCATCGTTGTTTCATA  |
| <i>Il17</i>     | TTTAACTCCCTTGGCGCAAAA    | CTTTCCCTCCGCATTGACAC     |
| <i>Tnfa</i>     | GAGAAAGTCAACCTCCTCTCTG   | GAAGACTCCTCCCAGGTATATG   |
| <i>Ifng</i>     | TCAAGTGGCATAGATGTGGAAGAA | TGGCTCTGCAGGATTTTCATG    |
| <i>Nos2</i>     | GTTCTCAGCCCAACAATACAAGA  | GTGGACGGGTTCGATGTAC      |
| <i>Lyve1</i>    | CTGACAAGCAGTTTCAGGCTTGGT | TTCAGCCCACACTCCGCTATACAT |
| <i>Pdnp</i>     | ACCGTGCCAGTGTTGTTCTG     | AGCACCTGTGGTTGTTATTTTGT  |
| <i>Prox1</i>    | CTCTTGCCCTCGCTATCCCC     | CACAGTCCCCTGACGTACC      |
| <i>Vegfc</i>    | CAGTGTGAGGCAGCTAACAAG    | GAAGGTCCACAGACATCATGGAA  |
| <i>Vegfd</i>    | TGGCAAGACTTTTGAGCTTCAA   | AAATCGCGCACTCTGAGGA      |
| <i>Vegfr2</i>   | GCCCTGCTGTGGTCTCACTAC    | CAAAGCATTGCCCATTCGAT     |
| <i>Vegfr3</i>   | ATCAGAAGATCGGGCGCTGTTGTA | TGTGTCATGTCCGCCCTTCAGTTA |
| <i>Icam</i>     | GTGATGCTCAGGTATCCATCCA   | CACAGTTCTCAAAGCACAGCG    |
| <i>Vcam</i>     | AGTTGGGGATTTCGGTTGTTCT   | CCCCTCATTCTTACCACCC      |
| <i>Ccl19</i>    | GGGGTGCTAATGATGCGGAA     | CCTTAGTGTGGTGAACACAACA   |
| <i>Ccl21</i>    | CCCTGCTTCAACCATTACATCTGC | CCTGCTGTCTCCTTCTCATTCC   |
| <i>Ccr7</i>     | TGTACGAGTCGGTGTGCTTC     | GGTAGGTATCCGTCATGGTCTTG  |
| <i>Star</i>     | GAACGGGGACGAAGTGCTAA     | TGGTCTACCACCACCTCCAA     |
| <i>Hsd3b1</i>   | CAGGAGAAAGAAGTGCAGGAGGTC | GCACACTTGCTTGAACACAGGC   |
| <i>Hsd17b1</i>  | AATTGAACGCTGTGGGTGCT     | GAATGGCAGTCCCATCAAGC     |
| <i>Cyp11a1</i>  | GGGGACAGTATGCTGGCTAA     | ACGTAGGGCTCAGGAAAGGT     |
| <i>Cyp17a1</i>  | TGGAGGCCACTATCCGAGAA     | CACATGTGTGTCTTCGGGA      |
| <i>Cyp19a1</i>  | TCACTCTACTAAGTCAAGGGCG   | GGGAGGCTCAGGTTCTGTTT     |
| <i>Ar</i>       | CCCTGAGGCCGCTAACATAG     | GGGCTTGAGGAGAACCATCC     |
| <i>Era</i>      | AATTCTGACAATCGACGCCAG    | GTGCTTCAACATTCTCCCTCCTC  |
| <i>Erb</i>      | TCTTTGCTCCAGACCTCGTTC    | GGGACAGCACTCTTCGTCTG     |
| <i>Fshr</i>     | GGTCTATTCCCTGCCCAACC     | AGGGAGCTTTTTCAAGCGGT     |
| <i>Lhr</i>      | ACGAGACGCTTCATCACTCTG    | GATGGCATGTCTCAGCCTCA     |
| <i>Inhba</i>    | AAATCAGAACGCCTCCGCTA     | TCCCGAGTGTAGAGTTCCGGT    |
| <i>Inhbb</i>    | AGGCCAGCGGATCAGTTTTA     | CAGGCCACTCGAAGGATTGT     |
| <i>Scgb1b24</i> | GCTCCTGCATTGAGGGGTAT     | ACATACTCTTCTGAGGTCTGTG   |
| <i>Tfr</i>      | AGAACCGCTGGTTGGAACAT     | GCGCAGCCTTGACTGAAAAA     |
| <i>Cldn11</i>   | TTGCTCTTTCTCGGGCATT      | CCCAATCCACACCCAAGTCA     |
| <i>Ocln</i>     | CCCCTCTTCTTAGGGCACA      | AGGCTCCCAAGATAAGCGAAC    |

|             |                        |                          |
|-------------|------------------------|--------------------------|
| <i>Tjp1</i> | AGACGCCCGAGGGTGTAG     | TGGGACAAAAGTCCGGGAAG     |
| <i>F11r</i> | GCAGATGCCAAGAAAACCCG   | TCTGGGCCTGGCAGTAGTAT     |
| <i>Ubc</i>  | GCCCAGTGTTACCACCAAGAAG | GCTCTTTTTAGATACTGTGGTGAG |

All sequences were verified through National Center for Biotechnology Information Primer-BLAST and single products were confirmed with a melting point dissociation step post amplification.

Il-1b, Interleukin 1b; Il-6, Interleukin 6; Il-17, Interleukin 17; Tnf-a, tumor necrosis factor alpha; Ifn-g, Interferon gamma; Nos2, nitric oxide synthase 2; Lyve-1, lymphatic vessel endothelial hyaluronan receptor 1; Prox-1, prospero homeobox 1; Vegf-c, vascular endothelial growth factor C; Vegf-d, vascular endothelial growth factor D; Vegfr-2, vascular endothelial growth factor receptor 2; Vegfr-3, vascular endothelial growth factor receptor 3; Icam, intercellular adhesion molecule; Vcam, vascular cell adhesion molecule; Ccl-19, chemokine ligand 19; Ccl-21, chemokine ligand 21; Ccr7, C-C chemokine receptor type 7; Star, steroidogenic acute regulatory; Hsd3b1, 3-beta hydroxysteroid dehydrogenase; Hsd17b1, 17-beta hydroxysteroid dehydrogenase; Cyp11a1, Cytochrome P450 side chain cleavage; Cyp17a1, Cytochrome P450 17 $\alpha$ -hydroxylase; Cyp19a1, Cytochrome P450 aromatase; Ar, Androgen receptor; Era, Estrogen receptor alpha; Erb, Estrogen receptor beta; Fshr, Follicle stimulating hormone receptor; Lhr, Luteinizing hormone receptor; Inhba, Inhibin beta a subunit; Inhbb, Inhibin beta b subunit; Scgb1b24, Secretoglobin, family 1B, member 24/ Androgen binding protein; Tfr, Transferrin; Cldn11, Claudin 11; Ocln, Occludin; Tjp1, Tight junction protein-1; F11r, Junctional adhesion molecule A; Ubc, Ubiquitin.

**Table S3. Body and testis/ovary weights.**

|                | Body Weight (BW) (g) | Testis/Ovary Weight (mg/BW) |
|----------------|----------------------|-----------------------------|
| CON (Male)     | 31.71 $\pm$ 1.03     | 3.42 $\pm$ 0.08             |
| SSHTN (Male)   | 31.87 $\pm$ 0.45     | 4.14 $\pm$ 0.10*            |
| CON (Female)   | 23.80 $\pm$ 0.59     | 0.22 $\pm$ 0.01             |
| SSHTN (Female) | 23.48 $\pm$ 0.51     | 0.21 $\pm$ 0.01             |

CON=C57 control mice, SSHTN=salt-sensitive hypertension;  $n=6$ , \* $P<0.05$

**Table S4. Body and testis/ovary weights.**

|               | Body Weight (BW) (g) | Testis/Ovary Weight (mg/BW) |
|---------------|----------------------|-----------------------------|
| CON (Male)    | 26.62 $\pm$ 0.86     | 3.66 $\pm$ 0.11             |
| LHTN (Male)   | 25.65 $\pm$ 0.43     | 4.12 $\pm$ 0.03*            |
| CON (Female)  | 20.23 $\pm$ 0.75     | 0.21 $\pm$ 0.01             |
| LHTN (Female) | 19.52 $\pm$ 0.57     | 0.23 $\pm$ 0.01             |

CON=C57 control mice, LHTN=L-NAME-induced hypertension;  $n=6$ , \* $P<0.05$

**Table S5. Quantification of LYVE-1 positive lymphatic vessels in CUBIC cleared gonads.**

| Sample  | LYVE-1 + vessel volume relative to total gonadal volume (%) |                    |
|---------|-------------------------------------------------------------|--------------------|
|         | Testes                                                      | Ovaries            |
| Control | 0.002798 ± 0.0002                                           | 0.003604 ± 0.0001  |
| SSHTN   | 0.006826 ± 0.0003*                                          | 0.005900 ± 0.0005* |
| LHTN    | 0.005596 ± 0.0007*                                          | 0.006698 ± 0.0005* |

SSHTN=salt-sensitive hypertension; LHTN=L-NAME-induced hypertension, (n=3, \*P<0.05)

### Supplementary Figures

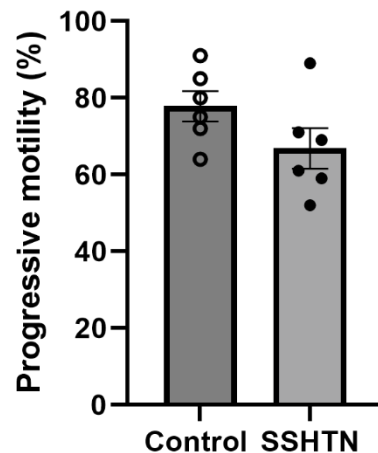

**Figure S1.** Progressive motility of spermatozoa collected from control and mice administered nitro-l-arginine methyl ester hydrochloride (L-NAME) in the drinking water for 2 weeks, then 2 weeks of tap water washout, then 3 weeks of 4% salt diet (SSHTN). Results are expressed as mean ± SEM, and statistical analysis consisted of a Student's *t* test. *n*=6, \**P*<0.05 vs control.

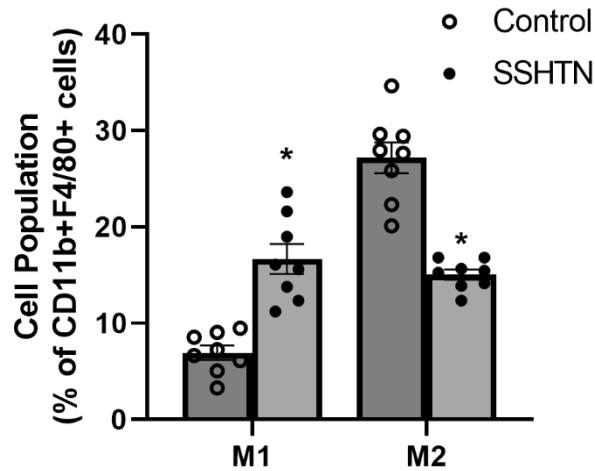

**Figure S2.** Macrophage (M1 and M2) populations expressed as percentage of CD11b+F4/80+ cells as determined by flow cytometry in testes from control and mice administered nitro-l-arginine methyl ester hydrochloride (L-NAME; 1.5 mg/ml) in the drinking water for 4 weeks, then 1 week of tap water washout, then a subsequent 3 weeks of 4% salt diet (SSHTN). Results are expressed as mean  $\pm$  SEM, and statistical analysis consisted of a Student's *t* test.  $n=8$ , \* $P<0.05$  vs control.

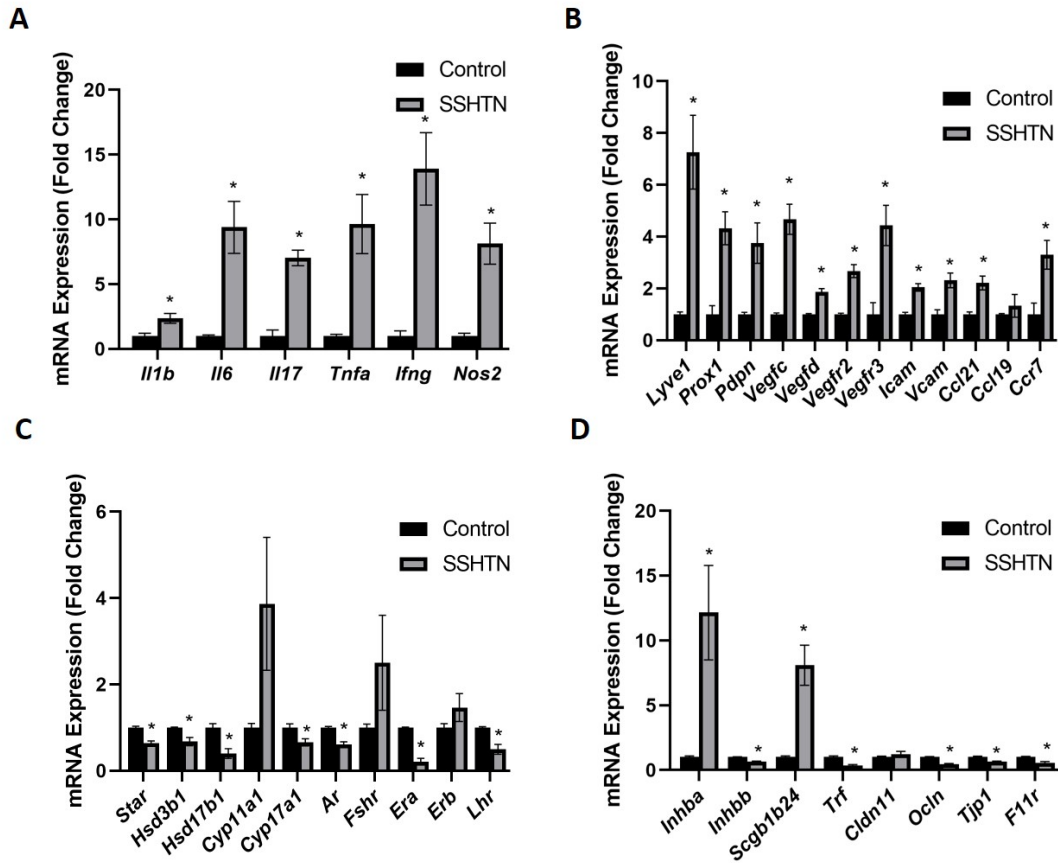

**Figure S3.** Gene expression of (A) pro-inflammatory mediators, (B) lymphatic markers, (C) steroidogenic pathway genes and hormone receptors, and (D) secretory proteins and tight junction proteins in the testes of control and mice administered nitro-L-arginine methyl ester hydrochloride (L-NAME; 1.5 mg/ml) in the drinking water for 4 weeks, then 1 week of tap water washout, then a subsequent 3 weeks of 4% salt diet (SSHTN). Results are expressed as mean  $\pm$  SEM. Statistical analyses were performed using Student's *t* test.  $n=6$ ,  $*P<0.05$  vs control.

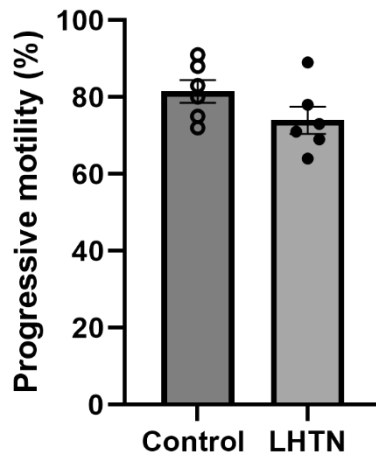

**Figure S4.** Progressive motility of spermatozoa collected from control and mice administered nitro-l-arginine methyl ester hydrochloride (L-NAME) in the drinking water for 3 weeks (LHTN). Results are expressed as mean  $\pm$  SEM, and statistical analysis consisted of a Student's *t* test.  $n=6$ , \* $P<0.05$  vs control.

### Legends for Video Files

**Supplement video 1:** CUBIC processed testis from control mice showing immunostaining for the lymphatic marker LYVE-1.

**Supplement video 2:** CUBIC processed testis from salt-sensitive hypertension (SSHTN) mice showing immunostaining for the lymphatic marker LYVE-1.

**Supplement video 3:** CUBIC processed ovary from control mice showing immunostaining for the lymphatic marker LYVE-1.

**Supplement video 4:** CUBIC processed ovary from salt-sensitive hypertension (SSHTN) mice showing immunostaining for the lymphatic marker LYVE-1.

**Supplement video 5:** CUBIC processed testis from L-NAME-induced hypertension (LHTN) mice showing immunostaining for the lymphatic marker LYVE-1.

**Supplement video 6:** CUBIC processed ovary from L-NAME-induced hypertension (LHTN) mice showing immunostaining for the lymphatic marker LYVE-1.
